# Supplementary material
Source: publisher figshare collection journal article supplement (https://tandf.figshare.com/ndownloader/files/16456172)
Supplement: Supplementary file 1 [file 16456172]

**Supplemental information**

**Evaluation of droplet-based microfluidic platforms as a convenient tool for lipases and esterases assays**

P. Jankowski, A. Samborski, R. Ostaszewski, P. Garstecki

**Determination of the calibration curve.**

The dependence of the concentration of the enzymatic reaction product on the intensity of the fluorescence signal for each drop was determined at the end of each experiment. The final stage of the experiment was to generate a droplet sequence being a mixture of a product solution with strictly defined concentration (Figure 1A, syringe 5) and buffer. As a result, four sequences were obtained containing droplets of the product with varying degrees of dilution with buffer. On this basis, a calibration curve was determined.

#
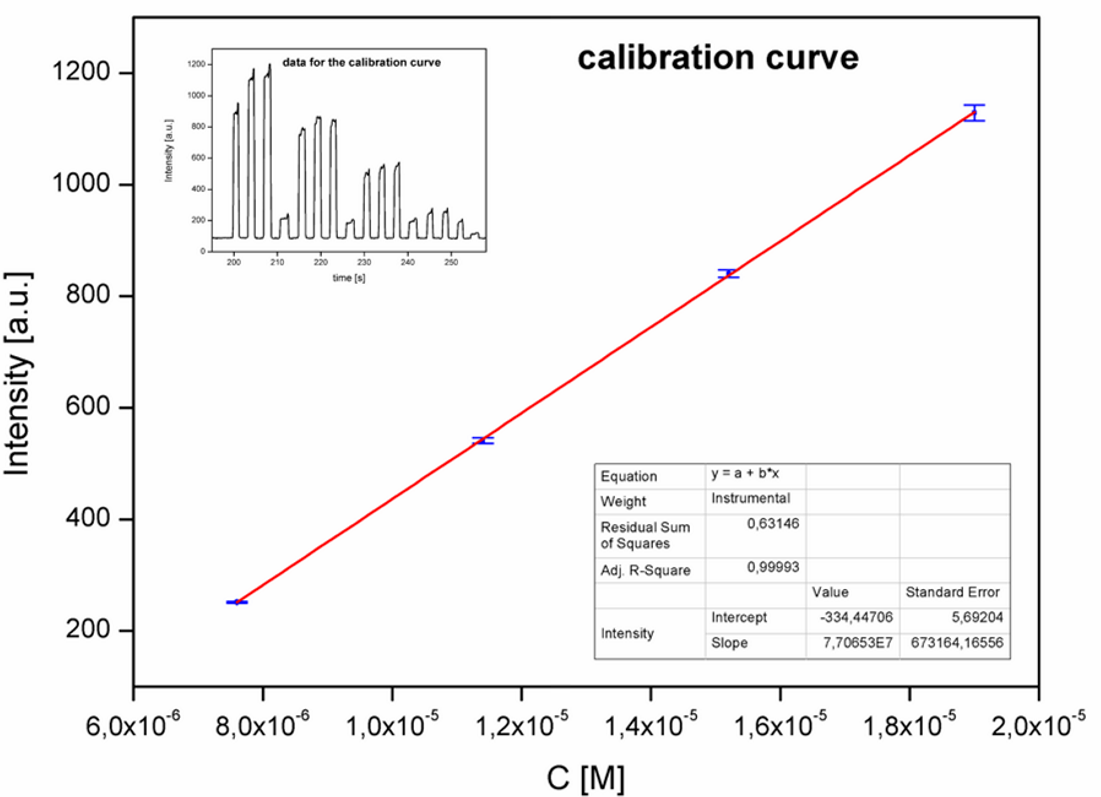


# Figure S1. Calibration curve prepared on the basis of four droplet sequences (inset) with different dilution of the product solution with buffer
